# Supplementary material
Source: Springer Nature journal article supplement (https://www.springermedizin.de/resource/supplementary/12903_2014_392_MOESM2_ESM.pdf/9516936)
Supplement: MOESM2 [file 9516936]

## Appendix 2

Search terms used within literature review

| <u>Search Terms</u>                                                                                                                                                                              | <u>Search</u>    |
|--------------------------------------------------------------------------------------------------------------------------------------------------------------------------------------------------|------------------|
| 1. ("patient centred care"[Tiab] OR "patient centered care"[Tiab] OR "person centered care"[Tiab] OR "person centred care"[Tiab] OR "patient focused care"[Tiab] OR "person focused care"[Tiab]) | <b>(2,000)</b>   |
| 2. (dental[Tiab] OR oral[Tiab] OR dentist*[Tiab])                                                                                                                                                | <b>(440,216)</b> |
| 3. "Patient-centred care"[Mesh]                                                                                                                                                                  | <b>(8,572)</b>   |
| 4. "Dentistry"[Mesh]                                                                                                                                                                             | <b>(207,683)</b> |
| 5. 1 <b>OR</b> 3                                                                                                                                                                                 | <b>(9,539)</b>   |
| 6. 2 <b>OR</b> 4                                                                                                                                                                                 | <b>(563,809)</b> |
| 7. 5 <b>AND</b> 6                                                                                                                                                                                | <b>(162)</b>     |
